# Supplementary material for: Physicians' Views of the Massachusetts Health Care Reform Law — A Poll
Source: Atypon-hosted journal article supplement (doi:10.1056/nejmp0909851), 2009-10-22
Supplement: nejm_steelfisher_e39sa1.pdf [file nejm_steelfisher_e39sa1.pdf]

## Supplementary Appendix

This appendix has been provided by the authors to give readers additional information about their work.

Supplement to: SteelFisher GK, Blendon RJ, Sussman T, et al. Physicians' views of the Massachusetts health care reform law — a poll. *N Engl J Med* 2009;361:e39. DOI: 10.1056/NEJMp0909851.

## Harvard School of Public Health

### Physician Views of Massachusetts Health Reform

Supported by grants from the Robert Wood Johnson Foundation  
and the Blue Cross Blue Shield of Massachusetts Foundation

#### Topline Results

*The study was conducted for the Harvard School of Public Health via mail and web (online) by SSRS/ICR, an independent research company. Interviews were conducted from August 11 to September 15, 2008, among a sample of 2135 physicians practicing in Massachusetts. The margin of error for total respondents is +/-2.1 percentage points at the 95% confidence level.*

1. In an average week, approximately what percent of your time do you spend on direct patient care?

|                     | 09/21/09 |
|---------------------|----------|
| LESS THAN 50% (NET) | 13       |
| Less than 10%       | 2        |
| 10-24%              | 4        |
| 25-49%              | 7        |
| 50% OR MORE (NET)   | 87       |
| 50-74%              | 15       |
| 75% or more         | 72       |
| None                | *        |
| Don't know          | *        |
| Refused             | *        |

2. Approximately what percent of your patients are now on Medicaid or are uninsured?

|                     | 09/21/09 |
|---------------------|----------|
| LESS THAN 50% (NET) | 81       |
| Less than 10%       | 33       |
| 10-24%              | 34       |
| 25-49%              | 14       |
| 50% OR MORE (NET)   | 8        |
| 50-74%              | 4        |
| 75% or more         | 4        |
| None                | 1        |
| Don't know          | 9        |
| Refused             | 1        |

3. Approximately what percent of your patients are now on Medicare?

|                            | 09/21/09 |
|----------------------------|----------|
| <b>LESS THAN 50% (NET)</b> | 68       |
| Less than 10%              | 15       |
| 10-24%                     | 24       |
| 25-49%                     | 29       |
| <b>50% OR MORE (NET)</b>   | 16       |
| 50-74%                     | 14       |
| 75% or more                | 2        |
| None                       | 6        |
| Don't know                 | 9        |
| Refused                    | 1        |

4. How would you rate the nation's system for providing medical care to Americans?

|          | Excellent | Good | Fair | Poor | Don't know | Refused |
|----------|-----------|------|------|------|------------|---------|
| 09/21/09 | 5         | 28   | 43   | 23   | 1          | *       |

5. How would you rate the Massachusetts system for providing medical care to people in this state?

|          | Excellent | Good | Fair | Poor | Don't know | Refused |
|----------|-----------|------|------|------|------------|---------|
| 09/21/09 | 10        | 53   | 30   | 6    | 1          | *       |

6. Overall, how satisfied are you with your current practice?

|          | Very satisfied | Somewhat satisfied | Somewhat dissatisfied | Very dissatisfied | Don't know | Refused |
|----------|----------------|--------------------|-----------------------|-------------------|------------|---------|
| 09/21/09 | 31             | 48                 | 16                    | 4                 | *          | 1       |

7. Thinking about the past three years, how have things at your practice changed overall? Have they gotten much better, somewhat better, somewhat worse, much worse, or haven't they changed at all?

|          | Much better | Somewhat better | Somewhat worse | Much worse | No change | Don't know | Refused |
|----------|-------------|-----------------|----------------|------------|-----------|------------|---------|
| 09/21/09 | 4           | 19              | 42             | 8          | 24        | 1          | 2       |

(Asked of respondents whose practice has gotten somewhat/much worse in the past three years; n = 1067)

8. Below is a list of reasons why things at your practice may have gotten worse. Please check whether each of the following is a major reason, minor reason, or not a reason at all why things have gotten worse at your practice.

a. The economy

|          | Major reason | Minor reason | Not a reason at all | Don't know | Refused |
|----------|--------------|--------------|---------------------|------------|---------|
| 09/21/09 | 35           | 47           |                     |            |         |

b. The Massachusetts Health Insurance Reform Law

|          | Major reason | Minor reason | Not a reason at all | Don't know | Refused |
|----------|--------------|--------------|---------------------|------------|---------|
| 09/21/09 | 11           | 34           | 43                  | 8          | 4       |

c. Changes in Medicare

|          | Major reason | Minor reason | Not a reason at all | Don't know | Refused |
|----------|--------------|--------------|---------------------|------------|---------|
| 09/21/09 | 24           | 38           | 29                  | 6          | 4       |

d. Changes in Medicaid

|          | Major reason | Minor reason | Not a reason at all | Don't know | Refused |
|----------|--------------|--------------|---------------------|------------|---------|
| 09/21/09 | 19           | 41           | 30                  | 6          | 5       |

e. Changes in private coverage

|          | Major reason | Minor reason | Not a reason at all | Don't know | Refused |
|----------|--------------|--------------|---------------------|------------|---------|
| 09/21/09 | 38           | 39           | 17                  | 3          | 4       |

f. Other changes in health care

|          | Major reason | Minor reason | Not a reason at all | Don't know | Refused |
|----------|--------------|--------------|---------------------|------------|---------|
| 09/21/09 | 39           | 34           | 10                  | 9          | 8       |

(Asked of respondents whose practice has gotten somewhat/much worse in the past three years; n = 1067)

8g. Is there any other reason why things at your practice might have gotten worse?

|                                                   | 09/21/09 |
|---------------------------------------------------|----------|
| <b>DIRECT PRACTICE CHANGES (NET)</b>              | 22       |
| Lack of quality physicians/staff                  | 8        |
| Increased volume of patients/workload             | 8        |
| Decreased care quality/individual care            | 5        |
| Too much/increasing overhead expenses             | 4        |
| Other direct practice changes mentions            | 2        |
| Poorer insurance coverage/reimbursement           | 18       |
| Administrative burden – paperwork/records/billing | 24       |
| Increase regulations/bureaucracy/malpractice      | 21       |
| Patient-related                                   | 4        |
| Other                                             | 6        |
| No                                                | 18       |
| Don't know                                        | 9        |
| Refused                                           | 9        |

(Asked of respondents whose practice has gotten somewhat/much better in the past three years; n = 488)

9. Below is a list of reasons why things at your practice may have gotten better. Please check whether each of the following is a major reason, minor reason, or not a reason at all why things have gotten better at your practice.

a. The economy

|          | Major reason | Minor reason | Not a reason at all | Don't know | Refused |
|----------|--------------|--------------|---------------------|------------|---------|
| 09/21/09 | 3            | 12           | 75                  | 5          | 6       |

b. The Massachusetts Health Insurance Reform Law

|          | Major reason | Minor reason | Not a reason at all | Don't know | Refused |
|----------|--------------|--------------|---------------------|------------|---------|
| 09/21/09 | 13           | 25           | 50                  | 7          | 5       |

c. Changes in Medicare

|          | Major reason | Minor reason | Not a reason at all | Don't know | Refused |
|----------|--------------|--------------|---------------------|------------|---------|
| 09/21/09 | 1            | 8            | 74                  | 9          | 7       |

d. Changes in Medicaid

|          | Major reason | Minor reason | Not a reason at all | Don't know | Refused |
|----------|--------------|--------------|---------------------|------------|---------|
| 09/21/09 | 2            | 8            | 74                  | 9          | 7       |

e. Changes in private coverage

|          | Major reason | Minor reason | Not a reason at all | Don't know | Refused |
|----------|--------------|--------------|---------------------|------------|---------|
| 09/21/09 | 8            | 21           | 58                  | 7          | 7       |

f. Other changes in health care

|          | Major reason | Minor reason | Not a reason at all | Don't know | Refused |
|----------|--------------|--------------|---------------------|------------|---------|
| 09/21/09 | 12           | 26           | 45                  | 11         | 6       |

(Asked of respondents whose practice has gotten somewhat/much better in the past three years; n = 488)

9g. Is there any other reason why things at your practice might have gotten better?

|                                             | 09/21/09 |
|---------------------------------------------|----------|
| <b>DIRECT PRACTICE CHANGES (NET)</b>        | 38       |
| Increased patient volume/practice expansion | 11       |
| Management/staff/internal improvements      | 26       |
| Other direct practice changes mentions      | 2        |
| Better coverage/reimbursement               | 6        |
| Technology changes                          | 20       |
| Administrative related                      | 3        |
| Business hours                              | 2        |
| Factors outside practice                    | 7        |
| Other                                       | 8        |
| No                                          | 12       |
| Don't know                                  | 9        |
| Refused                                     | 5        |

10. Given what you know about it, in general, do you support or oppose the Massachusetts Health Insurance Reform Law?

|          | Support | Oppose | Don't know | Refused |
|----------|---------|--------|------------|---------|
| 09/21/09 | 70      | 13     | 13         | 3       |

11. Do you think the Massachusetts Health Insurance Reform Law should be repealed, continued as the law currently stands, or continued but with some changes made?

|          | Repealed | Continued as the law currently stands | Continued, but with some changes made | Don't know | Refused |
|----------|----------|---------------------------------------|---------------------------------------|------------|---------|
| 09/21/09 | 7        | 29                                    | 46                                    | 15         | 3       |

(Asked of respondents who believe Massachusetts Health Insurance Reform Law should continue, but with some changes made; n = 995)

12. Briefly, what would be the most important change you would like to see made?

| <i>Most important change physicians would like to see</i>                | <i>09/21/09</i> |
|--------------------------------------------------------------------------|-----------------|
| <b>Expand Coverage (net)</b>                                             | 34              |
| <b>Include all/more people</b>                                           | 11              |
| <b>Ensure better/more comprehensive coverage</b>                         | 12              |
| <b>Increase physicians/providers available</b>                           | 7               |
| <b>Introduce single payer system</b>                                     | 3               |
| <b>Ensure businesses cannot drop Coverage</b>                            | 1               |
|                                                                          |                 |
| <b>Address Costs (net)</b>                                               | 23              |
| <b>Institute cost controls/spending limits</b>                           | 6               |
| <b>Utilize more/different funding</b>                                    | 7               |
| <b>Implement malpractice reform/tort reform</b>                          | 2               |
| <b>Ensure affordability</b>                                              | 7               |
|                                                                          |                 |
| <b>Improve Reimbursement</b>                                             | 13              |
|                                                                          |                 |
| <b>Reduce Coverage (net)</b>                                             | 8               |
| <b>Restrict access</b>                                                   | 1               |
| <b>Increase patient contributions/<br/>    Ensure income eligibility</b> | 7               |
|                                                                          |                 |
| <b>Other (net)</b>                                                       | 10              |
| <b>Streamline administration</b>                                         | 4               |
| <b>Eliminate mandate</b>                                                 | 2               |
| <b>Regulate insurance companies</b>                                      | 1               |
| <b>Other</b>                                                             | 3               |
|                                                                          |                 |
| <b>Don't know</b>                                                        | 7               |
| <b>Refused</b>                                                           | 5               |

13. Generally speaking, do you think the Massachusetts Health Insurance Reform Law is helping, hurting, or not having much of an impact on each of the following?

a. People who did not have health insurance before the law

|          | <b>Helping</b> | <b>Hurting</b> | <b>Not having much impact</b> | <b>Don't know</b> | <b>Refused</b> |
|----------|----------------|----------------|-------------------------------|-------------------|----------------|
| 09/21/09 | 79             | 3              | 10                            | 7                 | 1              |

b. People who did have health insurance before the law

|          | <b>Helping</b> | <b>Hurting</b> | <b>Not having much impact</b> | <b>Don't know</b> | <b>Refused</b> |
|----------|----------------|----------------|-------------------------------|-------------------|----------------|
| 09/21/09 | 7              | 16             | 67                            | 9                 | 1              |

c. Primary care practices

|          | <b>Helping</b> | <b>Hurting</b> | <b>Not having much impact</b> | <b>Don't know</b> | <b>Refused</b> |
|----------|----------------|----------------|-------------------------------|-------------------|----------------|
| 09/21/09 | 31             | 25             | 16                            | 27                | 2              |

d. Specialty practices

|          | <b>Helping</b> | <b>Hurting</b> | <b>Not having much impact</b> | <b>Don't know</b> | <b>Refused</b> |
|----------|----------------|----------------|-------------------------------|-------------------|----------------|
| 09/21/09 | 24             | 18             | 29                            | 27                | 1              |

e. Hospitals

|          | <b>Helping</b> | <b>Hurting</b> | <b>Not having much impact</b> | <b>Don't know</b> | <b>Refused</b> |
|----------|----------------|----------------|-------------------------------|-------------------|----------------|
| 09/21/09 | 31             | 24             | 11                            | 33                | 2              |

f. The quality of care in Massachusetts

|          | <b>Helping</b> | <b>Hurting</b> | <b>Not having much impact</b> | <b>Don't know</b> | <b>Refused</b> |
|----------|----------------|----------------|-------------------------------|-------------------|----------------|
| 09/21/09 | 37             | 12             | 34                            | 15                | 2              |

g. The overall cost of health care in Massachusetts

|          | <b>Helping</b> | <b>Hurting</b> | <b>Not having much impact</b> | <b>Don't know</b> | <b>Refused</b> |
|----------|----------------|----------------|-------------------------------|-------------------|----------------|
| 09/21/09 | 9              | 53             | 11                            | 25                | 2              |

h. The cost that patients in Massachusetts pay

|          | <b>Helping</b> | <b>Hurting</b> | <b>Not having much impact</b> | <b>Don't know</b> | <b>Refused</b> |
|----------|----------------|----------------|-------------------------------|-------------------|----------------|
| 09/21/09 | 16             | 31             | 21                            | 30                | 2              |

i. Patients' ability to get to see a primary care provider

|          | <b>Helping</b> | <b>Hurting</b> | <b>Not having much impact</b> | <b>Don't know</b> | <b>Refused</b> |
|----------|----------------|----------------|-------------------------------|-------------------|----------------|
| 09/21/09 | 29             | 34             | 19                            | 18                | 1              |

j. Patients' ability to get to see a specialty physician

|          | <b>Helping</b> | <b>Hurting</b> | <b>Not having much impact</b> | <b>Don't know</b> | <b>Refused</b> |
|----------|----------------|----------------|-------------------------------|-------------------|----------------|
| 09/21/09 | 24             | 22             | 30                            | 23                | 1              |

14. Now, about your practice and the patients you see:

Generally speaking, do you think the Massachusetts Health Insurance Reform Law is helping, hurting, or not having much of an impact on each of the following?

a. Your medical practice overall

|          | <b>Helping</b> | <b>Hurting</b> | <b>Not having much impact</b> | <b>Don't know</b> | <b>Refused</b> |
|----------|----------------|----------------|-------------------------------|-------------------|----------------|
| 09/21/09 | 22             | 13             | 57                            | 7                 | 1              |

b. The hospital where you practice or send most of your patients

|          | <b>Helping</b> | <b>Hurting</b> | <b>Not having much impact</b> | <b>Don't know</b> | <b>Refused</b> |
|----------|----------------|----------------|-------------------------------|-------------------|----------------|
| 09/21/09 | 23             | 18             | 31                            | 27                | 1              |

c. The quality of care your patients receive

|          | <b>Helping</b> | <b>Hurting</b> | <b>Not having much impact</b> | <b>Don't know</b> | <b>Refused</b> |
|----------|----------------|----------------|-------------------------------|-------------------|----------------|
| 09/21/09 | 19             | 6              | 66                            | 8                 | 1              |

d. The overall cost of health care for your patients

|          | <b>Helping</b> | <b>Hurting</b> | <b>Not having much impact</b> | <b>Don't know</b> | <b>Refused</b> |
|----------|----------------|----------------|-------------------------------|-------------------|----------------|
| 09/21/09 | 16             | 26             | 35                            | 22                | 1              |

e. The costs that your patients pay out-of-pocket for needed care

|          | <b>Helping</b> | <b>Hurting</b> | <b>Not having much impact</b> | <b>Don't know</b> | <b>Refused</b> |
|----------|----------------|----------------|-------------------------------|-------------------|----------------|
| 09/21/09 | 21             | 21             | 33                            | 24                | 1              |

15. Now, about how this law may be affecting specific aspects of your practice:

Generally speaking, do you think the Massachusetts Health Insurance Reform Law is helping, hurting, or not having much of an impact on each of the following?

a. The administrative burden on your practice

|          | <b>Helping</b> | <b>Hurting</b> | <b>Not having much impact</b> | <b>Not relevant to your practice / NA</b> | <b>Don't know</b> | <b>Refused</b> |
|----------|----------------|----------------|-------------------------------|-------------------------------------------|-------------------|----------------|
| 09/21/09 | 3              | 35             | 43                            | 6                                         | 12                | 1              |

b. The amount of time you can spend with a patient

|          | <b>Helping</b> | <b>Hurting</b> | <b>Not having much impact</b> | <b>Not relevant to your practice / NA</b> | <b>Don't know</b> | <b>Refused</b> |
|----------|----------------|----------------|-------------------------------|-------------------------------------------|-------------------|----------------|
| 09/21/09 | 2              | 21             | 66                            | 7                                         | 4                 | 1              |

c. Your ability to get needed referrals for your patients

|          | <b>Helping</b> | <b>Hurting</b> | <b>Not having much impact</b> | <b>Not relevant to your practice / NA</b> | <b>Don't know</b> | <b>Refused</b> |
|----------|----------------|----------------|-------------------------------|-------------------------------------------|-------------------|----------------|
| 09/21/09 | 11             | 20             | 51                            | 9                                         | 8                 | 1              |

d. Your patients' continuity of care

|          | <b>Helping</b> | <b>Hurting</b> | <b>Not having much impact</b> | <b>Not relevant to your practice / NA</b> | <b>Don't know</b> | <b>Refused</b> |
|----------|----------------|----------------|-------------------------------|-------------------------------------------|-------------------|----------------|
| 09/21/09 | 26             | 10             | 49                            | 7                                         | 7                 | 2              |

e. Your patients' adherence to the care regimen you've prescribed

|          | <b>Helping</b> | <b>Hurting</b> | <b>Not having much impact</b> | <b>Not relevant to your practice / NA</b> | <b>Don't know</b> | <b>Refused</b> |
|----------|----------------|----------------|-------------------------------|-------------------------------------------|-------------------|----------------|
| 09/21/09 | 21             | 8              | 54                            | 8                                         | 8                 | 1              |

f. Your ability to have a patient admitted to a hospital

|          | <b>Helping</b> | <b>Hurting</b> | <b>Not having much impact</b> | <b>Not relevant to your practice / NA</b> | <b>Don't know</b> | <b>Refused</b> |
|----------|----------------|----------------|-------------------------------|-------------------------------------------|-------------------|----------------|
| 09/21/09 | 11             | 4              | 61                            | 14                                        | 9                 | 1              |

g. Your ability to keep a patient in the hospital the length of time you feel is necessary

|          | <b>Helping</b> | <b>Hurting</b> | <b>Not having much impact</b> | <b>Not relevant to your practice / NA</b> | <b>Don't know</b> | <b>Refused</b> |
|----------|----------------|----------------|-------------------------------|-------------------------------------------|-------------------|----------------|
| 09/21/09 | 5              | 10             | 52                            | 19                                        | 13                | 1              |

h. Your ability to order diagnostic tests or procedures for your patients

|          | <b>Helping</b> | <b>Hurting</b> | <b>Not having much impact</b> | <b>Not relevant to your practice / NA</b> | <b>Don't know</b> | <b>Refused</b> |
|----------|----------------|----------------|-------------------------------|-------------------------------------------|-------------------|----------------|
| 09/21/09 | 18             | 17             | 50                            | 7                                         | 7                 | 1              |

i. Your ability to prescribe drugs your patients need

|          | <b>Helping</b> | <b>Hurting</b> | <b>Not having much impact</b> | <b>Not relevant to your practice / NA</b> | <b>Don't know</b> | <b>Refused</b> |
|----------|----------------|----------------|-------------------------------|-------------------------------------------|-------------------|----------------|
| 09/21/09 | 21             | 22             | 43                            | 6                                         | 7                 | 1              |

j. Your personal financial situation

|          | <b>Helping</b> | <b>Hurting</b> | <b>Not having much impact</b> | <b>Not relevant to your practice / NA</b> | <b>Don't know</b> | <b>Refused</b> |
|----------|----------------|----------------|-------------------------------|-------------------------------------------|-------------------|----------------|
| 09/21/09 | 5              | 19             | 62                            | 5                                         | 8                 | 2              |

k. The financial situation of your practice as a whole

|          | <b>Helping</b> | <b>Hurting</b> | <b>Not having much impact</b> | <b>Not relevant to your practice / NA</b> | <b>Don't know</b> | <b>Refused</b> |
|----------|----------------|----------------|-------------------------------|-------------------------------------------|-------------------|----------------|
| 09/21/09 | 9              | 24             | 47                            | 5                                         | 14                | 2              |

l. Your insured patients' ability to pay for care

|          | <b>Helping</b> | <b>Hurting</b> | <b>Not having much impact</b> | <b>Not relevant to your practice / NA</b> | <b>Don't know</b> | <b>Refused</b> |
|----------|----------------|----------------|-------------------------------|-------------------------------------------|-------------------|----------------|
| 09/21/09 | 12             | 14             | 53                            | 4                                         | 15                | 1              |

m. Your uninsured patients' ability to pay for care

|          | <b>Helping</b> | <b>Hurting</b> | <b>Not having much impact</b> | <b>Not relevant to your practice / NA</b> | <b>Don't know</b> | <b>Refused</b> |
|----------|----------------|----------------|-------------------------------|-------------------------------------------|-------------------|----------------|
| 09/21/09 | 42             | 9              | 27                            | 5                                         | 15                | 1              |

16. Generally speaking, do you think the Massachusetts Health Insurance Reform Law is increasing, decreasing, or not having much of an impact on each of the following?

a. The amount of time patients wait to get an appointment to see you

|          | <b>Increasing</b> | <b>Decreasing</b> | <b>Not having much impact</b> | <b>Not relevant to your practice / NA</b> | <b>Don't know</b> | <b>Refused</b> |
|----------|-------------------|-------------------|-------------------------------|-------------------------------------------|-------------------|----------------|
| 09/21/09 | 24                | 2                 | 60                            | 9                                         | 5                 | 1              |

b. The amount of time patients wait in the waiting room before they can see you

|          | <b>Increasing</b> | <b>Decreasing</b> | <b>Not having much impact</b> | <b>Not relevant to your practice / NA</b> | <b>Don't know</b> | <b>Refused</b> |
|----------|-------------------|-------------------|-------------------------------|-------------------------------------------|-------------------|----------------|
| 09/21/09 | 17                | 1                 | 70                            | 8                                         | 4                 | 1              |

c. The number of patients in your practice who are uninsured

|          | <b>Increasing</b> | <b>Decreasing</b> | <b>Not having much impact</b> | <b>Not relevant to your practice / NA</b> | <b>Don't know</b> | <b>Refused</b> |
|----------|-------------------|-------------------|-------------------------------|-------------------------------------------|-------------------|----------------|
| 09/21/09 | 7                 | 48                | 29                            | 6                                         | 9                 | 1              |

d. The number of patients in your practice who receive uncompensated care – either because they are uninsured or because their insurance does not cover the care they need

|          | <b>Increasing</b> | <b>Decreasing</b> | <b>Not having much impact</b> | <b>Not relevant to your practice / NA</b> | <b>Don't know</b> | <b>Refused</b> |
|----------|-------------------|-------------------|-------------------------------|-------------------------------------------|-------------------|----------------|
| 09/21/09 | 13                | 33                | 33                            | 7                                         | 14                | 1              |

17. What is your medical specialty?

|                                        | 09/21/09  |
|----------------------------------------|-----------|
| <b>PRIMARY CARE PHYSICIAN (NET)</b>    | <b>34</b> |
| Family Practice                        | 7         |
| General Practice                       | 1         |
| Internal Medicine                      | 15        |
| Pediatrics                             | 12        |
| <b>SPECIALIST (NET)</b>                | <b>65</b> |
| Allergy/Immunology                     | 1         |
| Anesthesiology                         | 1         |
| Cardiology                             | 3         |
| Dermatology                            | 2         |
| Emergency Medicine                     | 2         |
| Endocrinology                          | 1         |
| Gastroenterology                       | 3         |
| Geriatrics                             | 1         |
| Infectious Diseases                    | 1         |
| Nephrology                             | 2         |
| Neurology                              | 3         |
| Obstetrics/Gynecology                  | 5         |
| Oncology/Hematology                    | 2         |
| Ophthalmology                          | 3         |
| Orthopedics                            | 3         |
| Otolaryngology (Ear, Nose, and Throat) | 2         |
| Pathology                              | 1         |
| Physical Medicine/Rehabilitation       | 1         |
| Podiatry                               | 4         |
| Psychiatry                             | 6         |
| Pulmonology                            | 1         |
| Radiology                              | 3         |
| Rheumatology                           | 1         |
| Surgery                                | 5         |
| Urology                                | 2         |
| Oral and maxillofacial surgery         | 1         |
| Radiation oncology                     | 1         |
| Plastic surgery                        | 1         |
| Neurosurgery                           | *         |
| Neonatology                            | *         |
| Neuropsychology                        | *         |
| Sleep medicine                         | *         |
| Oral surgery (dentistry)               | *         |
| Other                                  | 4         |
| Refused                                | 1         |

18. What year did you graduate from medical school?

|                 | 09/21/09 |
|-----------------|----------|
| 1979 or earlier | 32       |
| 1980-1989       | 30       |
| 1990- 1999      | 26       |
| 2000-2009       | 9        |
| Don't know      | --       |
| Refused         | 2        |

19. In what kind of practice setting do you provide most of your direct patient care?

|                                                           | 09/21/09 |
|-----------------------------------------------------------|----------|
| IN A HOSPITAL (NET)                                       | 35       |
| Inpatient Unit <u>in a hospital</u>                       | 7        |
| Emergency Department <u>in a hospital</u>                 | 2        |
| Ambulatory Clinic or Office <u>in a hospital</u>          | 22       |
| Laboratory or Radiology Practice <u>in a hospital</u>     | 3        |
| NOT IN A HOSPITAL (NET)                                   | 60       |
| Ambulatory Clinic or Office <u>NOT in a hospital</u>      | 48       |
| Laboratory or Radiology Practice <u>NOT in a hospital</u> | *        |
| Ambulatory Surgical Center <u>NOT in a hospital</u>       | 1        |
| Urgent Care Clinic <u>NOT in a hospital</u>               | *        |
| Community Health Center                                   | 4        |
| Private practice/office practice                          | 5        |
| Multi-specialty clinic                                    | *        |
| Other                                                     | 4        |
| Don't know                                                | *        |
| Refused                                                   | 1        |

20. Approximately what percent of your patients belong to racial/ethnic minority groups, including African Americans, Hispanics, and Asians?

|                     | 09/21/09 |
|---------------------|----------|
| LESS THAN 50% (NET) | 85       |
| Less than 10%       | 23       |
| 10-24%              | 38       |
| 25-49%              | 24       |
| 50% OR MORE (NET)   | 10       |
| 50-74%              | 6        |
| 75% or more         | 5        |
| None                | *        |
| Don't know          | 3        |
| Refused             | 1        |

21. Including you, how many physicians are there at your practice site, meaning at the address or suite where you do most of your direct patient care?

|            | 09/21/09 |
|------------|----------|
| 1-5        | 51       |
| 6-10       | 20       |
| 11-20      | 12       |
| 21+        | 15       |
| Don't know | *        |
| Refused    | 2        |

- 21a. In contracting with most payers, is this group of physicians completely independent or are you joined with other practices?

|          | Completely independent | Joined with other practices | Don't know | Refused |
|----------|------------------------|-----------------------------|------------|---------|
| 09/21/09 | 35                     | 55                          | 7          | 2       |

22. Regarding your employment, do you own your own practice, are you a partner or part-owner in a practice, or are you an employee of a hospital or practice?

|          | Own practice | Partner/part-owner in a practice | Employee of a hospital or practice | Don't know | Refused |
|----------|--------------|----------------------------------|------------------------------------|------------|---------|
| 09/21/09 | 22           | 21                               | 56                                 | *          | 1       |

23. Are you paid primarily through a salary or some other means?

|          | Salary | Some other means | Both salary and other means | Don't know | Refused |
|----------|--------|------------------|-----------------------------|------------|---------|
| 09/21/09 | 56     | 21               | 19                          | *          | 3       |

24. How many beds are in the hospital where you practice, or to which most of your patients are admitted?

|                | 09/21/09 |
|----------------|----------|
| 1-100          | 8        |
| 101-300        | 31       |
| 301-500        | 11       |
| 501-1000       | 11       |
| More than 1000 | *        |
| Not Applicable | 14       |
| Don't know     | 23       |
| Refused        | 2        |

25. Thinking about this same hospital, would you say that most, some, or just a few of the patients received uncompensated care or were on Medicaid or MassHealth prior to the Massachusetts Health Insurance Reform Law?

|          | <b>Most patients</b> | <b>Some patients</b> | <b>Just a few patients</b> | <b>Not Applicable</b> | <b>Don't know</b> | <b>Refused</b> |
|----------|----------------------|----------------------|----------------------------|-----------------------|-------------------|----------------|
| 09/21/09 | 9                    | 44                   | 9                          | 14                    | 19                | 5              |

26. Are you...?

|          | <b>Male</b> | <b>Female</b> | <b>Refused</b> |
|----------|-------------|---------------|----------------|
| 09/21/09 | 69          | 30            | 1              |

### RACE SUMMARY TABLE

|                                           | <b>09/21/09</b> |
|-------------------------------------------|-----------------|
| White (non-Hispanic)                      | 77              |
| Black/African American (non-Hispanic)     | 1               |
| Asian (non-Hispanic)                      | 10              |
| Hispanic (NET)                            | 3               |
| White Hispanic                            | 2               |
| Black Hispanic                            | *               |
| Hispanic, Other                           | *               |
| Hispanic unspecified                      | 1               |
| American Indian or Alaska Native          | *               |
| Native Hawaiian or other Pacific Islander | *               |
| Middle eastern                            | 1               |
| Some other race                           | *               |
| Refused                                   | 6               |
